# Supplementary material
Source: Springer Nature journal article supplement (http://www.springermedizin.de/resource/supplementary/12968_2012_2650_MOESM4_ESM.pdf/9582414)

**A**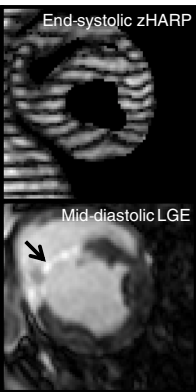**B**

Directional Strains [%]    Principal Strains [%]

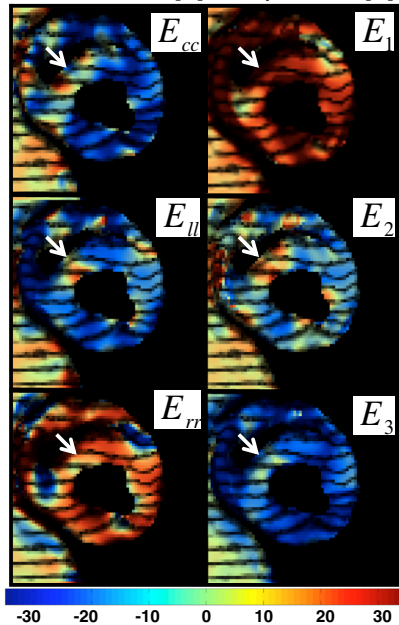**C**

Directional Strains [%]

Principal Strains [%]

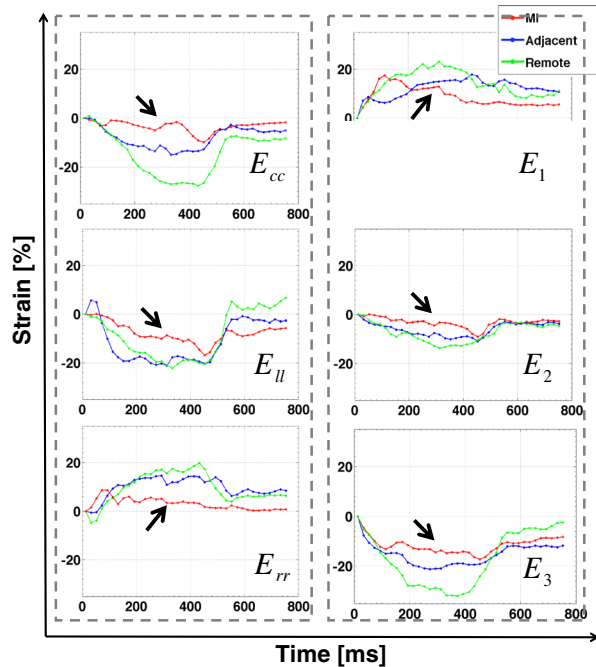

Supplement: MOESM4 [file 9582414]
